# Supplementary material for: Investigating Novel Resistance Mechanisms to Third-Generation EGFR Tyrosine Kinase Inhibitor Osimertinib in Non–Small Cell Lung Cancer Patients
Source: Oxford University Press journal article supplement (doi:10.1158/1078-0432.ccr-17-2310), 2018-03-05
Supplement: 10780432ccr172310-sup-187547_3_supp_4572570_p47r8f.xlsx [file 10780432ccr172310-sup-187547_3_supp_4572570_p47r8f.xlsx]

## Sheet: Sheet1
Supplemental Table 3. Genetic alterations identified in the 12 patients with paired pre- and post-osimertinib treatment samples.
Case ID	Gender	Age at diagnosis	Smoking	Histological type at diagnosis	Stage	First-line TKI treatment			Pre-osimertinib treatment				Post-osimertinib treatment
						Pretreatment EGFR status	TKI	PFS (months)	Gene	Nucleotide change	Amino acid change	MAF (tumor tissue_FFPE)	PFS (months)	MAF (plasma cfDNA)
15	F	44	NO	Adenocarcinoma	IV	Ex19 del	gefitinib	11	EGFR	c.2236_2250del	p. exon 19 del	0.43	8	0.13
									EGFR	c.C2369T	p.T790M	0.1713		0.0448
									TP53	c.G428A	p.C143Y	0.2545		-
									BTK	c.A128T	p.D43V	0.1098		-
									EGFR	c.T2389G	p.C797G	-		0.01
									EGFR	c.C2374T	p.L792F	-		0.0159
									EGFR	c.T2389A	p.C797S	-		0.0135
									MYC	c.G144C	p.Q48H	-		0.0104
									TP53	c.G824A	p.C275Y	-		0.0632
									BTK	c.A230T	p.D77V	-		0.0304
Case ID	Gender	Age at diagnosis	Smoking	Histological type at diagnosis	Stage	Pretreatment EGFR status	TKI	PFS (months)	Gene	Nucleotide change	Amino acid change	MAF (plasma cfDNA)	PFS (months)	MAF (plasma cfDNA)
22	F	62	No	Adenocarcinoma	IV	Ex19 del	gefitinib	9	EGFR	c.C2252T	p.T751I	0.8562	8	0.81
									EGFR	c.C2369T	p.T790M	0.7763		0.7922
									EGFR	c.2235_2249del	p. exon 19 del	0.86		0.82
									EXT2	c.G1699T	p.V567F	0.0196		-
									TP53	c.C154T	p.Q52X	0.8901		-
									STAG2	c.C1840T	p.R614X	0.1969		-
									EGFR	CNV	-	13.64		7.91
									CCNE1	CNV	-	6.81		-
									CCND1	CNV	-	4.34		-
									FLT4	CNV	-	3.31		-
									RB1	CNV	-	0.32		0.52
									EGFR	c.T2153A	p.L718Q	-		0.0114
									EGFR	c.C2374T	p.L792F	-		0.0172
									EGFR	c.T2375A	p.L792H	-		0.0427
									EGFR	c.T2389A	p.C797S	-		0.3457
									EGFR	c.G2390C	p.C797S	-		0.2036
									TSC2	c.C2225T	p.S742L	-		0.1831
									TP53	c.C37T	p.Q13X	-		0.5446
									STAG2	c.C1840T	p.R614X	-		0.1592
Case ID	Gender	Age at diagnosis	Smoking	Histological type at diagnosis	Stage	Pretreatment EGFR status	TKI	PFS (months)	Gene	Nucleotide change	Amino acid change	MAF (pleural effusion_cfDNA)	PFS (months)	MAF (pleural effusion_cfDNA)
28	F	66	No	Adenocarcinoma	IV	L858R	icotinib	9	EGFR	c.C2369T	p.T790M	0.01	8	-
									MTOR	c.G7216T	p.V2406L	0.2799		0.2216
									EGFR	c.T2573G	p.L858R	0.7704		0.8122
									POLE	c.G5827A	p.A1943T	0.4697		0.3122
									GNAS	c.G1184A	p.R395Q	0.0309		-
									EGFR	CNV	-	4.21		5.24
									PAK3	CNV	-	2.74		1.72
									TP53	CNV	-	0.51		0.64
									EGFR	c.T2153A	p.L718Q	-		0.3821
									CBL	c.T1150C	p.C384R	-		0.0308
									AMER1	c.G238A	p.G80S	-		0.0105
Case ID	Gender	Age at diagnosis	Smoking	Histological type at diagnosis	Stage	Pretreatment EGFR status	TKI	PFS (months)	Gene	Nucleotide change	Amino acid change	MAF (tumor tisse_fresh)	PFS (months)	MAF (plasma cfDNA)
32	M	43	No	Adenocarcinoma	IV	L858R	erlotinib	24	EGFR	c.T2573G	p.L858R	0.1213	17	-
									EGFR	c.C2369T	p.T790M	0.09		-
									CTNNB1	c.G101A	p.G34E	0.1751		-
									EGFR	CNV	-	3.71		-
									PIK3CA	CNV	-	1.74		-
									MET	c.A2595T	p.I865F	-		0.0217
Case ID	Gender	Age at diagnosis	Smoking	Histological type at diagnosis	Stage	Pretreatment EGFR status	TKI	PFS (months)	Gene	Nucleotide change	Amino acid change	MAF (tumor tissue_FFPE)	PFS (months)	MAF (plasma cfDNA)
36	F	52	No	Adenocarcinoma	IV	L858R	gefitinib	14	EGFR	c.T2573G	p.L858R	0.0446	13	0.1937
									EGFR	c.C2023T	p.R675W	0.0136		-
									TNFRSF14	c.G349A	p.A117T	0.1168		-
									MTHFR	c.C665T	p.A222V	0.3048		-
									PDE11A	c.C708A	p.D236E	0.2176		-
									PKD2	c.A1354G	p.I452V	0.1379		-
									PALLD	c.A406G	p.S136G	0.272		-
									FAT1	c.A8963T	p.K2988I	0.2453		-
									MAP3K1	c.G2665C	p.V889L	0.1498		-
									CSF1R	c.G2092T	p.D698Y	0.1651		-
									RECQL4	c.G3545A	p.R1182H	0.1429		-
									RECQL4	c.A212G	p.E71G	0.1041		-
									CYP2C19	c.G991A	p.V331I	0.237		-
									CYP2C9	c.A1075C	p.I359L	0.2731		-
									ARID2	c.G4300T	p.A1434S	0.2198		-
									RNF43	c.C578T	p.A193V	0.1594		-
									AXIN2	c.G1807C	p.A603P	0.2818		-
									CYP2A6	c.A1312T	p.N438Y	0.1928		-
									ERCC2	c.A2251C	p.K751Q	0.1531		-
									POLD1	c.G56A	p.R19H	0.1462		-
									TP53	c.851_852delCA	p.T284fs	0.0806		-
									RB1	CNV	-	0.52		-
									MET	CNV	-	-		2.42
									TET2	c.G3595T	p.V1199L	-		0.1435
									FANCG	c.C1769T	p.P590L	-		0.0682
									ZNF217	c.C2056T	p.P686S	-		0.2183
Case ID	Gender	Age at diagnosis	Smoking	Histological type at diagnosis	Stage	Pretreatment EGFR status	TKI	PFS (months)	Gene	Nucleotide change	Amino acid change	MAF (plasma cfDNA)	PFS (months)	MAF (plasma cfDNA)
43	F	44	No	Small cell	-	Ex19 del	icotinib	2	EGFR	c.2240_2257del	p. exon 19 del	0.22	4	0.12
									EGFR	c.C2369T	p.T790M	0.03		0.003
									TP53	c.G313C	p.G105R	0.1972		-
							erlotinib	2	IL7R	c.G714A	p.M238I	-		0.052
									TP53	c.G196C	p.G66R	-		0.1177
									STK11	c.G890A	p.R297K	-		0.1239
Case ID	Gender	Age at diagnosis	Smoking	Histological type at diagnosis	Stage	Pretreatment EGFR status	TKI	PFS (months)	Gene	Nucleotide change	Amino acid change	MAF (tumor tissue_FFPE)	PFS (months)	MAF (plasma cfDNA)
44	F	78	No	Adenocarcinoma	IV	Ex19 del	erlotinib	11	EGFR	c.2235_2249del	p. exon 19 del	0.3	8	0.11
									EGFR	c.C2369T	p.T790M	0.09		0.0315
									PKHD1	c.C3785T	p.A1262V	0.1146		-
									TP53	c.G736T	p.E246X	0.4353		0.1303
									EGFR	CNV	-	2.04		1.6
									HGF	CNV	-	1.8		1.62
									CD274	CNV	-	1.84		-
									CYP19A1	c.A1424G	p.H475R	-		0.051
									NF1	c.G8452A	p.A2818T	-		0.02
Case ID	Gender	Age at diagnosis	Smoking	Histological type at diagnosis	Stage	Pretreatment EGFR status	TKI	PFS (months)	Gene	Nucleotide change	Amino acid change	MAF (tumor tissue_fresh)	PFS (months)	MAF (plasma cfDNA)
59	F	44	No	Adenocarcinoma	IV	Ex19 del	gefitinib	4	EGFR	c.2236_2250del	p. exon 19 del	0.49	8	0.42
									EGFR	c.C2369T	p.T790M	0.1369		-
									PTK2	c.G2545A	p.E849K	0.553		-
									PTK2	c.G2530A	p.D844N	0.5536		-
									TP53	c.T353C	p.V118A	0.4604		0.5471
									PIK3CA	c.G1624A	p.E542K	-		0.2339
									PIK3CA	c.G1633A	p.E545K	-		0.0247
									PTK2	c.G2479A	p.E827K	-		0.4783
									PTK2	c.G2464A	p.D822N	-		0.4916
									MED12	c.C3127T	p.L1043F	-		0.101
									KRAS	CNV	-	-		2.15
									NKX2-1	CNV	-	-		7.71
									AKT2	CNV	-	-		2.84
									CCNE1	CNV	-	-		1.94
									RB1	CNV	-	-		0.51
Case ID	Gender	Age at diagnosis	Smoking	Histological type at diagnosis	Stage	Pretreatment EGFR status	TKI	PFS (months)	Gene	Nucleotide change	Amino acid change	MAF (plasma cfDNA)	PFS (months)	MAF (plasma cfDNA)
70	F	56	No	Adenocarcinoma	IV	L858R	erlotinib	25	EGFR	c.T2573G	p.L858R	0.07	6	0.002
									EGFR	c.C2369T	p.T790M	0.21		0.003
Case ID	Gender	Age at diagnosis	Smoking	Histological type at diagnosis	Stage	Pretreatment EGFR status	TKI	PFS (months)	Gene	Nucleotide change	Amino acid change	MAF (plasma cfDNA)	PFS (months)	MAF (plasma cfDNA)
72	F	77	No	Adenocarcinoma	IV	L858R	erlotinib	6	EGFR	c.T2573G	p.L858R	0.556	5	0.6388
									EGFR	c.C2369T	p.T790M	0.2955		-
									MTOR	c.G6016A	p.V2006I	0.0295		0.0313
									XPC	c.A203T	p.D68V	0.011		-
									FGFR4	c.G1162A	p.G388R	0.0102		-
									MGMT	c.C343T	p.L115F	0.0145		-
									TSC2	c.A856G	p.M286V	0.0133		-
									TP53	c.A628G	p.R210G	0.1854		-
									POLD1	c.G356A	p.R119H	0.016		-
									POLD1	c.G2572A	p.V858M	0.0106		-
									EGFR	CNV	-	-		2.22
									TP53	c.A349G	p.R117G	-		0.3907
									RUNX1	c.C174G	p.H58Q	-		0.0296
									ARAF	CNV	-	-		5.72
									GATA1	CNV	-	-		3.31
Case ID	Gender	Age at diagnosis	Smoking	Histological type at diagnosis	Stage	Pretreatment EGFR status	TKI	PFS (months)	Gene	Nucleotide change	Amino acid change	MAF (plasma cfDNA)	PFS (months)	MAF (plasma cfDNA)
85	M	58	Yes	Adenocarcinoma	IIIB	L858R	icotinib	2	EGFR	c.T2573G	p.L858R	0.01	7	0.226
									NF1	c.A6160T	p.M2054L	0.0121		-
									RRM1	c.G370A	p.V124I	-		0.1907
									YAP1	c.C1249T	p.P417S	-		0.0802
									FLCN	c.G265T	p.A89S	-		0.1926
									CTNNB1	c.T133C	p.S45P	-		0.0705
									CDK4	CNV	-	-		2.42
									PTPN11	CNV	-	-		2.04
Case ID	Gender	Age at diagnosis	Smoking	Histological type at diagnosis	Stage	Pretreatment EGFR status	TKI	PFS (months)	Gene	Nucleotide change	Amino acid change	MAF (Pleural effusion_cfDNA)	PFS (months)	MAF (plasma cfDNA)
89	F	75	No	Adenocarcinoma	IV	L858R	gefitinib	12	EGFR	c.T2573G	p.L858R	0.0181	6	0.02
									EGFR	c.C2369T	p.T790M	0.01		-
									CDA	c.A79C	p.K27Q	0.0233		-
									DUSP2	c.C224A	p.A75E	0.0121		-
									TET2	c.G3908A	p.S1303N	0.0351		0.0222
									DAXX	c.G716A	p.R239Q	0.0194		-
									ALDH2	c.G1369A	p.E457K	0.0113		-
									KMT2B	c.G6028A	p.A2010T	0.03		-
									TP53	c.572_574del	p.191_192del	-		0.02
Point mutations and Indels are presented as mutant allele frequency (MAF); Copy number variations (CNV) are presented as fold change of relative coverage depth
"-": mutation or CNV undetectable
Alterations that are acquired during the treatment are highlighted in red.
