# Supplementary material for: Investigating Novel Resistance Mechanisms to Third-Generation EGFR Tyrosine Kinase Inhibitor Osimertinib in Non–Small Cell Lung Cancer Patients
Source: Oxford University Press journal article supplement (doi:10.1158/1078-0432.ccr-17-2310), 2018-03-05
Supplement: 10780432ccr172310-sup-187547_3_supp_4572571_p47r8g.xlsx [file 10780432ccr172310-sup-187547_3_supp_4572571_p47r8g.xlsx]

## Sheet: Sheet1
Supplemental Table 2. Information for cfDNA extraction, library preparation input and NGS coverage depth.
Case ID	Total cfDNA amount extracted (ng)	cfDNA input for library preparation (ng)	NGS coverage depth X (unique reads)
1	33	33	2091.59
2	24.2	24.2	640.79
3	1024	200	1172.85
4	89	89	3340.05
5	960	200	1117.61
6	37.5	37.5	971.6
7	57.5	57.5	1769.89
8	541.2	200	874.94
9	29.1	29.1	799.79
10	52	52	1280.55
12	166	166	1267.36
13	138.5	138.5	2268.14
14	14.7	14.7	414
15	15.825	15.825	667.53
16	478.8	200	1484.49
17	1776	200	992.49
18	135	135	1023.14
19	55.5	55.5	851.99
20	108	108	908.24
21	38.7	38.7	853.82
22_post	324.76	200	1207.13
22_pre	13.38	13.38	481
23	115.5	115.5	1117.41
24	74.5	74.5	1413.35
25	137	137	936.13
26	83	83	1259.72
27	486	200	3302.63
28_post	442.1	200	2424
28_pre	830	200	2013
30	6.084	6.084	353
31	66.5	66.5	2875.54
32	43	43	997.71
33	96.82	96.82	343
35	35.752	35.75	923.76
36	88	88	1189.22
37	109	109	897.83
38	41.5	41.5	2381.49
40	32.5	32.5	1260.2
41	42.75	42.75	969.17
42	16.95	16.95	796.17
43_post	46.25	46.25	1148.34
43_pre	408	200	729.61
44	60.5	60.5	905.9
46	22.45	22.45	2936.53
47	15.674	15.674	628
48	206	206	3009.42
50	26.5	26.5	1352.14
51	200.64	200.64	2191.49
52	318	200	734
54	33.408	33.41	385.14
55	28.25	28.25	803.27
56	53.28	53.28	877.7
57	197.6	197.6	2367.19
58	142	142	1511.4
59	57.5	57.5	1105.34
60	153.5	153.5	2178.36
61	43.7	43.7	769.12
62	28	28	854.6
63	42.8	42.8	765.76
64	37.25	37.25	823.55
65	20.7	20.7	528.2
66	83.5	83.5	1070.34
67	22.3	22.3	895.39
68	92.5	92.5	2784.1
70_post	72	72	905.9
70_pre	43.7	43.7	355.02
71	352.5	200	1448.49
72_post	223.2	200	918.39
72_pre	13.9	13.9	628
73	86.5	86.5	1971.39
74	1390	200	1452.91
75	88.74	88.74	2565.69
77	163	163	1145.37
78	70.5	70.5	1971.31
79	103	103	668.78
80	45.25	45.25	1097.89
81	35.75	35.75	1983.9
82	69	69	808.22
84	139.5	139.5	2710.12
85_post	67	67	951.41
85_pre	25.944	25.94	605.15
86	19.2	19.2	405.49
88	475	200	2056.37
89_post	78	78	662.85
89_pre	1050	200	2150
90	19.62	19.62	794
91	14.48	14.48	460
92	162	162	1066.21
93	90.5	90.5	2129.65
note: pre, pre-treatment; post, post-treatment
