# Supplementary material for: Investigating Novel Resistance Mechanisms to Third-Generation EGFR Tyrosine Kinase Inhibitor Osimertinib in Non–Small Cell Lung Cancer Patients
Source: Oxford University Press journal article supplement (doi:10.1158/1078-0432.ccr-17-2310), 2018-03-05
Supplement: 10780432ccr172310-sup-187547_3_supp_4572573_p47r8g.xlsx [file 10780432ccr172310-sup-187547_3_supp_4572573_p47r8g.xlsx]

## Sheet: Sheet1
Supplemental Table 5. Genetic alterations identified in the 81 patients with post-osimertinib samples only.
Case ID	Sample Type	Gene	Nucleotide change	Amino acid change	SNV/Indel (MAF)	CNV (fold change)
1	Plasma cfDNA	EGFR	c.2235_2249delGGAATTAAGAGAAGC	p. exon19 del	0.005	-
		EGFR	c.T2389A	p.C797S	0.0176	-
		SMAD4	c.T103C	p.F35L	0.0377	-
		SMAD4	c.T1061C	p.V354A	0.0395	-
2	Plasma cfDNA	ATM	c.T2918A	p.L973Q	0.2337	-
		EGFR	c.2237_2251del	p. exon19 del	0.08	-
		EGFR	c.T2389A	p.C797S	0.01	-
		EGFR	c.C2369T	p.T790M	0.05	-
		INPP4B	c.G2070T	p.K690N	0.0619	-
		TP53	c.532delC	p.H178fs	0.16	-
3	Plasma cfDNA	EGFR	c.2235_2249delGGAATTAAGAGAAGC	p. exon19 del	0.25	-
		EGFR	c.T2389A	p.C797S	0.0777	-
		EGFR	c.C2369T	p.T790M	0.0699	-
		TP53	c.G287A	p.C96Y	0.1363	-
4	Plasma cfDNA	EGFR	c.2235_2249del	p. exon19 del	0.002	-
5	Plasma cfDNA	BARD1	c.C1676T	p.S559F	0.0274	-
		EGFR	CNV	-	-	14.8
		EGFR	c.2235_2249delGGAATTAAGAGAAGC	p. exon19 del	0.9479	-
		EGFR	c.T2389A	p.C797S	0.1111	-
		EGFR	c.C2369T	p.T790M	0.3507	-
		ERBB2	CNV	-	-	2.33
		GRIN2A	c.G14A	p.G5D	0.1311	-
		RECQL4	c.A2560G	p.T854A	0.0245	-
		SUFU	c.G518A	p.R173K	0.248	-
		SUFU	c.A519T	p.R173S	0.248	-
		WT1	c.C1124A	p.A375D	0.1993	-
6	Plasma cfDNA	CTNNB1	c.C110T	p.S37F	0.0582	-
		EGFR	c.2236_2250del	p. exon19 del	0.27	-
		EGFR	c.2238_2252del	p. exon19 del	0.007	-
		EGFR	c.G2390C	p.C797S	0.05	-
		EGFR	c.C2369T	p.T790M	0.13	-
		PCDH11X	c.G1546T	p.D516Y	0.0536	-
		PDGFRB	c.G3259A	p.E1087K	0.0961	-
		SMAD4	c.1585_1619del	p.L529fs	0.12	-
		TP53	c.C476T	p.A159V	0.1906	-
7	Plasma cfDNA	EGFR	c.2235_2249delGGAATTAAGAGAAGC	p. exon19 del	0.047	-
		EGFR	c.C2369T	p.T790M	0.0171	-
		PDGFRB	c.C2456T	p.S819F	0.0405	-
		TET2	c.327delC	p.I109fs	0.013	-
		TP53	c.G422A	p.C141Y	0.0302	-
8	Plasma cfDNA	BRAF	c.G1045A	p.A349T	0.098	-
		EGFR	CNV	-	-	2.41
		EGFR	c.2235_2249del	p. exon19 del	0.71	-
		EGFR	c.G2390C	p.C797S	0.23	-
		EGFR	c.C2369T	p.T790M	0.44	-
		TP53	c.C310T	p.Q104X	0.4035	-
9	Plasma cfDNA	EGFR	c.2236_2250delGAATTAAGAGAAGCA	p. exon19 del	0.15	-
		EGFR	c.T2389A	p.C797S	0.04	-
		EGFR	c.C2369T	p.T790M	0.04	-
		RB1	c.T2313A	p.Y771X	0.0856	-
		TP53	c.A290C	p.Q97P	0.0472	-
10	Plasma cfDNA	ABCB1	c.G3385A	p.E1129K	0.0454	-
		AMER1	c.G1848A	p.W616X	0.0787	-
		EGFR	c.2235_2249delGGAATTAAGAGAAGC	p. exon19 del	0.13	-
		EGFR	c.G2390C	p.C797S	0.08	-
		EGFR	c.C2369T	p.T790M	0.1	-
		PIK3CA	c.G1633A	p.E545K	0.0548	-
		TP53	c.C874T	p.Q292X	0.0617	-
11	Tumor tissue (fresh)	EGFR	CNV	-	-	2.04
		EGFR	c.T2389A	p.C797S	0.12	-
		EGFR	c.T2573G	p.L858R	0.57	-
		EGFR	c.C2369T	p.T790M	0.005	-
		FGFR2	c.C2020G	p.L674V	0.3143	-
		MED12	c.C5383T	p.P1795S	0.1681	-
		PLK1	c.C68G	p.P23R	0.2061	-
		TNFAIP3	c.C10A	p.Q4K	0.3235	-
		TP53	c.C457T	p.Q153X	0.6184	-
12	Plasma cfDNA	CDKN2A	c.G205T	p.E69X	0.0495	-
		EGFR	c.T2389A	p.C797S	0.0912	-
		EGFR	c.T2573G	p.L858R	0.2671	-
		EGFR	c.C2369T	p.T790M	0.0884	-
		FGFR4	c.G727T	p.E243X	0.1102	-
		GRIN2A	c.C2807A	p.S936X	0.0373	-
		INPP4B	c.G2050A	p.V684I	0.0776	-
		MSH6	c.G379T	p.V127F	0.0738	-
		PKHD1	c.T5918A	p.L1973Q	0.066	-
		SMAD4	c.C1067T	p.P356L	0.0935	-
		SRC	c.A1586T	p.Q529L	0.0681	-
		TP53	c.A542G	p.Y181C	0.216	-
		TSC1	c.A667G	p.M223V	0.0629	-
		TSC2	c.G417C	p.R139S	0.0438	-
13	Plasma cfDNA	EGFR	c.T2389A	p.C797S	0.003	-
		EGFR	c.T2573G	p.L858R	0.21	-
		EGFR	c.C2369T	p.T790M	0.01	-
		PIK3CA	c.A3140T	p.H1047L	0.0416	-
		RAF1	c.G1743A	p.M581I	0.1499	-
14	Plasma cfDNA	APC	c.1568delA	p.K523fs	0.16	-
		BTG2	c.G206A	p.R69H	0.0115	-
		DNMT3A	c.G2177A	p.G726D	0.0104	-
		EGFR	c.T2389G	p.C797G	0.02	-
		EGFR	c.T2389A	p.C797S	0.11	-
		EGFR	c.T185G	p.L62R	0.1	-
		EGFR	c.T2573G	p.L858R	0.06	-
		EGFR	c.C2369T	p.T790M	0.13	-
		ERBB3	c.G701A	p.G234D	0.0111	-
		FH	c.G1500C	p.W500C	0.1052	-
		GATA3	c.C1061A	p.P354H	0.0168	-
		PTCH1	c.G2167A	p.E723K	0.0125	-
		TNFAIP3	c.G1490A	p.R497H	0.014	-
16	Plasma cfDNA	DDR2	c.G323T	p.G108V	0.026	-
		EGFR	CNV	-	-	5.4
		EGFR	c.2235_2249delGGAATTAAGAGAAGC	p. exon19 del	0.95	-
		EGFR	c.G2390C	p.C797S	0.002	-
		EGFR	c.C2374T	p.L792F	0.01	-
		EGFR	c.T2375A	p.L792H	0.0039	-
		EGFR	c.C2369T	p.T790M	0.73	-
		GNAS	c.G50A	p.R17K	0.1778	-
		POLD1	c.G1646A	p.R549H	0.1756	-
		PTEN	c.G625A	p.G209R	0.0579	-
		PTEN	c.G904A	p.G302R	0.277	-
		PTEN	c.G1545T	p.K515N	0.0913	-
		RB1	CNV	-	-	0.51
		RB1	c.G1267T	p.G423X	0.041	-
		RB1	c.C763T	p.R255X	0.6644	-
		TP53	c.G410T	p.C137F	0.8818	-
		TUBB2A	c.G553A	p.A185T	0.2778	-
17	Plasma cfDNA	EGFR	CNV	-	-	2.73
		EGFR	c.2235_2249del	p. exon19 del	0.0071	-
		EGFR	c.T2389A	p.C797S	0.06	-
		EGFR	c.C2374T	p.L792F	0.01	-
		EGFR	c.C2380T	p.P794S	0.01	-
		EGFR	c.C2369T	p.T790M	0.07	-
		PIK3CA	c.A3140G	p.H1047R	0.1055	-
		TP53	c.A757G	p.T253A	0.4966	-
18	Plasma cfDNA	CDC73	c.C622T	p.L208F	0.0191	-
		EGFR	CNV	-	-	5
		EGFR	c.2235_2249delGGAATTAAGAGAAGC	p. exon19 del	0.7	-
		EGFR	c.G2390C	p.C797S	0.13	-
		EGFR	c.T2375G	p.L792R	0.5	-
		EGFR	c.C2369T	p.T790M	0.62	-
		ERBB4	c.G1178A	p.R393Q	0.2287	-
		KMT2A	c.A1831G	p.I611V	0.0188	-
		PIK3CA	c.G1633A	p.E545K	0.1584	-
		RET	c.C3157T	p.P1053S	0.0139	-
		SMAD4	c.G1051A	p.D351N	0.2445	-
		TP53	c.T434A	p.L145Q	0.2566	-
19	Plasma cfDNA	EGFR	c.T2389G	p.C797G	0.01	-
		EGFR	c.T2389A	p.C797S	0.01	-
		EGFR	c.C2374T	p.L792F	0.0337	-
		EGFR	c.T2375A	p.L792H	0.1168	-
		EGFR	c.C2369T	p.T790M	0.1404	-
20	Plasma cfDNA	EGFR	CNV	-	-	3.92
		EGFR	c.G2390C	p.C797S	0.0993	-
		EGFR	c.G2386A	p.G796S	0.0292	-
		EGFR	c.C2374T	p.L792F	0.0092	-
		EGFR	c.T2375A	p.L792H	0.0039	-
		EGFR	c.T2375C	p.L792P	0.0477	-
		EGFR	c.T2573G	p.L858R	0.6677	-
		EGFR	c.C2369T	p.T790M	0.3739	-
		EGFR	c.G2404T	p.V802F	0.0054	-
		TP53	c.C335G	p.P112R	0.1285	-
21	Plasma cfDNA	CCND1	CNV	-	-	2.21
		EGFR	c.T2389A	p.C797S	0.002	-
		EGFR	c.T2375A	p.L792H	0.09	-
		EGFR	c.T2573G	p.L858R	0.22	-
		EGFR	c.G2327A	p.R776H	0.16	-
		EGFR	c.C2369T	p.T790M	0.13	-
		FANCD2	c.G2303C	p.G768A	0.0872	-
		FGF19	CNV	-	-	3.03
		FLT4	c.C2866T	p.Q956X	0.085	-
		KDR	CNV	-	-	2
		NKX2-1	CNV	-	-	3.42
		TP53	c.C245A	p.S82Y	0.1436	-
23	Plasma cfDNA	EGFR	c.C2152G	p.L718V	0.01	-
		EGFR	c.C2374T	p.L792F	0.05	-
		EGFR	c.T2573G	p.L858R	0.13	-
		EGFR	c.C2369T	p.T790M	0.05	-
		FLT4	c.C1680G	p.I560M	0.0304	-
		PARP1	c.G1303T	p.E435X	0.033	-
		TP53	c.863delA	p.N288fs	0.1	-
24	Plasma cfDNA	EGFR	c.2238_2252delATTAAGAGAAGCAAC	p. exon19 del	0.04	-
		EGFR	c.T2375G	p.L792R	0.0543	-
		EGFR	c.C2369T	p.T790M	0.0578	-
		GATA6	c.51delG	p.A17fs	0.003	-
25	Plasma cfDNA	EGFR	c.2236_2244delGAATTAAGA	p. exon19 del	0.3	-
		EGFR	c.G2248C	p.A750P	0.3	-
		EGFR	c.G2386C	p.G796R	0.006	-
		EGFR	c.T2153A	p.L718Q	0.13	-
		EGFR	c.C2152G	p.L718V	0.08	-
		EGFR	c.C2374G	p.L792V	0.02	-
		EGFR	c.C2369T	p.T790M	0.007	-
		TP53	c.G320A	p.G107E	0.0455	-
		XPC	c.G1498T	p.A500S	0.0318	-
26	Plasma cfDNA	BTK	c.G1006A	p.G336R	0.018	-
		CTNNB1	c.G94T	p.D32Y	0.0185	-
		DNMT3A	c.2338delA	p.I780fs	0.04	-
		EGFR	c.2236_2244delGAATTAAGA	p. exon19 del	0.02	-
		EGFR	c.G2248C	p.A750P	0.0228	-
		EGFR	c.T2153A	p.L718Q	0.0271	-
		LZTR1	c.G115A	p.E39K	0.0101	-
		NOTCH2	c.C6892T	p.R2298W	0.0123	-
		SETD2	c.C877G	p.P293A	0.018	-
		SMAD4	c.A1064G	p.D355G	0.0149	-
		WRN	c.G3570A	p.M1190I	0.0144	-
27	Plasma cfDNA	ATRX	c.G187A	p.E63K	0.2084	-
		ATRX	c.C6277T	p.R2093X	0.2032	-
		CBL	c.G539A	p.R180Q	0.1566	-
		DAXX	c.A883G	p.S295G	0.4873	-
		EGFR	c.T2153A	p.L718Q	0.1274	-
		EGFR	c.T2573G	p.L858R	0.3266	-
		EMSY	c.G2635A	p.A879T	0.2108	-
		GRIN2A	c.C1766A	p.A589D	0.1478	-
		KMT2A	c.G7132A	p.D2378N	0.3391	-
		KRAS	c.G35C	p.G12A	0.0233	-
		MSH2	c.G2179C	p.A727P	0.3237	-
		MSH6	c.G1930A	p.E644K	0.344	-
		NKX2-1	CNV	-	-	4.46333
		TP53	CNV	-	-	0.5325
		TP53	c.A370T	p.T124S	0.3871	-
		TUBB4A	c.G375T	p.E125D	0.1944	-
29	Tumor tissue (fresh)	CDK12	CNV	-	-	3.2
		DNMT3A	c.1069delG	p.A357fs	0.025	-
		EGFR	c.T2573G	p.L858R	0.3273	-
		EGFR	c.C2152G	p.L718V	0.186	-
		ERBB2	CNV	-	-	3.6
		FGF19	CNV	-	-	2.4
		RPTOR	CNV	-	-	2.1
		TP53	CNV	-	-	0.65
		TP53	c.T379C	p.S127P	0.2092	-
30	Plasma cfDNA	EGFR	c.G2156C	p.G719A	0.02	-
		NOTCH1	c.A1756C	p.T586P	0.0476	-
		PBRM1	c.A152T	p.H51L	0.0317	-
		PIK3R2	c.G203C	p.G68A	0.0412	-
31	Plasma cfDNA	CDKN2A	c.172delC	p.R58fs	0.1	-
		CEP57	c.777_778insA	p.I259fs	0.11	-
		EGFR	c.G2156C	p.G719A	0.36	-
		EGFR	c.G2303T	p.S768I	0.3324	-
		FLT4	c.G1873T	p.E625X	0.1158	-
		KMT2B	c.C1508G	p.T503R	0.0588	-
		PBRM1	c.3550_3551insA	p.M1184fs	0.13	-
		TP53	c.G818T	p.R273L	0.1421	-
33	Plasma cfDNA	ESR1	c.C194T	p.A65V	0.0105	-
		JAK3	c.G3316A	p.E1106K	0.0124	-
		MET	c.C290A	p.P97Q	0.0109	-
		TSHR	c.T1780A	p.F594I	0.0132	-
34	Tumor tissue (FFPE)	AXIN2	c.G418A	p.E140K	0.1188	-
		DENND1A	c.C1969G	p.P657A	0.2243	-
		EGFR	CNV	-	-	2.5
		EGFR	c.2236_2250del	p. exon19 del	0.64	-
		MCL1	c.G325C	p.E109Q	0.1526	-
		MET	CNV	-	-	7.12
		POLH	c.G442A	p.E148K	0.241	-
		TP53	c.G818A	p.R273H	0.5432	-
35	Plasma cfDNA	EGFR	c.2235_2236del	p.K745fs	0.09	-
		EGFR	c.2240_2255del	p.L747fs	0.09	-
		MET	CNV	-	-	3.01
37	Plasma cfDNA	EGFR	CNV	-	-	2.14
		EGFR	c.G1102A	p.D368N	0.026	-
		EGFR	c.T2573G	p.L858R	0.45	-
		EGFR	c.G2303T	p.S768I	0.49	-
		EPCAM	c.G324C	p.K108N	0.0252	-
		FGFR3	c.G2162A	p.C721Y	0.0661	-
		FGFR4	c.G986A	p.G329D	0.045	-
		MET	CNV	-	-	2.1
		SMAD4	c.G1063T	p.D355Y	0.0708	-
		TP53	c.G884T	p.G295V	0.0689	-
38	Plasma cfDNA	ATR	c.C4045G	p.Q1349E	0.0782	-
		EGFR	c.T2582A	p.L861Q	0.1864	-
		GRIN2A	c.C3443T	p.P1148L	0.0804	-
		MET	CNV	-	-	2.94
		NRAS	c.G179A	p.G60E	0.1383	-
		RICTOR	c.C2743T	p.R915X	0.0389	-
		WT1	c.C736T	p.H246Y	0.0794	-
39	Tumor tissue (FFPE)	BRCA2	c.C3883A	p.Q1295K	0.0146	-
		CTNNB1	c.C110T	p.S37F	0.691	-
		EGFR	c.2238_2252delATTAAGAGAAGCAAC	p. exon19 del	0.38	-
		EGFR	c.T2240C	p.L747S	0.0115	-
		KRAS	CNV	-	-	3.5
		TP53	c.G169T	p.V57L	0.6565	-
		WAS	c.C121T	p.R41X	0.3872	-
40	Plasma cfDNA	EGFR	CNV	-	-	3.31
		EGFR	c.2240_2257delTAAGAGAAGCAACATCTC	p.LREATSP747delinsS	0.63	-
		EGFR	c.C2369T	p.T790M	0.04	-
		GNAS	c.G501A	p.M167I	0.0325	-
		PARP1	c.A299G	p.D100G	0.1171	-
		TP53	c.G197T	p.G66V	0.0629	-
		TP53	c.C178T	p.Q60X	0.0673	-
41	Plasma cfDNA	BLM	c.A2446C	p.M816L	0.0254	-
		EGFR	c.2235_2249delGGAATTAAGAGAAGC	p. exon19 del	0.25	-
		EGFR	c.C2369T	p.T790M	0.04	-
		SMARCA4	c.G3502A	p.A1168T	0.1166	-
42	Plasma cfDNA	EGFR	c.2236_2250delGAATTAAGAGAAGCA	p. exon19 del	0.025	-
		EGFR	c.C2369T	p.T790M	0.004	-
		PIK3CA	c.A1777G	p.I593V	0.0481	-
		TP53	c.G529A	p.V177M	0.0316	-
		TUBB2A	c.G553A	p.A185T	0.4787	-
45	Tumor tissue (fresh)	ALK	c.G776A	p.R259H	0.2336	-
		APC	c.C26G	p.P9R	0.2913	-
		AXIN2	c.C67T	p.R23W	0.2605	-
		EGFR	c.2235_2249delGGAATTAAGAGAAGC	p. exon19 del	0.55	-
		EGFR	c.C2369T	p.T790M	0.18	-
		RB1	c.2235_2239delAGAAG	p.K745fs	0.73	-
		TP53	c.351delG	p.G117fs	0.67	-
46	Plasma cfDNA	EGFR	c.2235_2249delGGAATTAAGAGAAGC	p. exon19 del	0.05	-
47	Plasma cfDNA	EGFR	c.2250_2273del	p. exon19 del	0.2	-
		EGFR	c.T2276A	p.I759N	0.2	-
		EGFR	c.C2369T	p.T790M	0.02	-
		TP53	c.C700T	p.R234C	0.0153	-
48	Plasma cfDNA	APC	c.C59A	p.S20X	0.1735	-
		EGFR	c.2236_2250delGAATTAAGAGAAGCA	p. exon19 del	0.4	-
		IL7R	CNV	-	-	1.62
		MAP3K1	c.G2362T	p.E788X	0.1375	-
		PIK3CA	c.G1633A	p.E545K	0.3424	-
		PIK3CA	c.G263A	p.R88Q	0.3546	-
		RB1	CNV	-	-	0.43
		RECQL4	CNV	-	-	1.8
		TOP2A	c.G2679C	p.K893N	0.0226	-
		TP53	c.C439T	p.R147X	0.8275	-
49	Tumor tissue (fresh)	BARD1	c.G808A	p.E270K	0.1047	-
		EGFR	CNV	-	-	2.41
		EGFR	c.2236_2250delGAATTAAGAGAAGCA	p. exon19 del	0.455	-
		HGF	CNV	-	-	2.03
		KDR	CNV	-	-	2.11
		KIT	CNV	-	-	2.1
		PMS1	c.C2150G	p.S717X	0.141	-
		RB1	CNV	-	-	0.54
		TP53	c.C355G	p.P119A	0.00415	-
50	Plasma cfDNA	ABCB1	c.C3011T	p.S1004L	0.1686	-
		ABCB1	c.C2978T	p.S993L	0.1763	-
		ATRX	c.C3188G	p.S1063X	0.0567	-
		EGFR	c.2235_2249delGGAATTAAGAGAAGC	p. exon19 del	0.2	-
		EXT1	c.A2217T	p.K739N	0.112	-
		KRAS	c.G34A	p.G12S	0.018	-
51	Plasma cfDNA	EGFR	c.2235_2249delGGAATTAAGAGAAGC	p. exon19 del	0.002	-
52	Plasma cfDNA	EGFR	c.2235_2249delGGAATTAAGAGAAGC	p. exon19 del	0.007	-
53	Tumor tissue (FFPE)	CYP2D6	c.G955A	p.V319I	0.1042	-
		EGFR	c.2238_2249delATTAAGAGAAGC	p. exon19 del	0.46	-
		EMSY	c.T2261C	p.V754A	0.102	-
		TP53	c.489_490delCA	p.Y163fs	0.39	-
54	Plasma cfDNA	EGFR	CNV	-	-	2.04
		EGFR	c.2236_2250del	p. exon19 del	0.38	-
		EPHA3	c.C1208T	p.T403I	0.0281	-
		TP53	c.238_254del	p.A80fs	0.05	-
55	Plasma cfDNA	EGFR	c.2235_2249delGGAATTAAGAGAAGC	p. exon19 del	0.006	-
56	Plasma cfDNA	EGFR	c.2235_2249del	p. exon19 del	0.0037	-
57	Plasma cfDNA	EGFR	p.746_751del	p. exon19 del	0.17	-
		KMT2A	c.G4205C	p.R1402T	0.1695	-
		KMT2B	c.C6128T	p.S2043F	0.343	-
		MYCL	c.C676G	p.Q226E	0.1858	-
		PIK3CA	c.G3094T	p.E1032X	0.0452	-
		TET2	c.A1015T	p.N339Y	0.038	-
		TP53	c.G250T	p.V84L	0.3885	-
58	Plasma cfDNA	EGFR	c.2240_2257del	p. exon19 del	0.01	-
60	Plasma cfDNA	DICER1	c.C3338G	p.S1113C	0.2751	-
		EGFR	c.2235_2249delGGAATTAAGAGAAGC	p. exon19 del	0.82	-
		EGFR	c.C2249A	p.A750E	0.279	-
		TP53	c.C405A	p.C135X	0.7718	-
61	Plasma cfDNA	EGFR	c.2250_2273del	p. exon19 del	0.04	-
		EGFR	c.T2276A	p.I759N	0.04	-
		PTEN	c.720_729del	p.Y240fs	0.17	-
		TP53	c.T496C	p.Y166H	0.2566	-
62	Plasma cfDNA	EGFR	c.2236_2250del	p. exon19 del	0.008	-
63	Plasma cfDNA	EGFR	c.2236_2250del	p. exon19 del	0.01	-
64	Plasma cfDNA	EGFR	c.2235_2249delGGAATTAAGAGAAGC	p. exon19 del	0.1842	-
		TUBB2A	c.G553A	p.A185T	0.2	-
65	Plasma cfDNA	EGFR	c.2238_2252del	p. exon19 del	0.007	-
66	Plasma cfDNA	EGFR	c.2236_2250delGAATTAAGAGAAGCA	p. exon19 del	0.007	-
		EGFR	c.C2252T	p.T751I	0.007	-
67	Plasma cfDNA	ARID2	c.4468delG	p.G1490fs	0.04	-
		EGFR	c.2238_2252del	p. exon19 del	0.02	-
		EGFR	c.A2275C	p.I759L	0.03	-
		TP53	c.C700T	p.R234C	0.0298	-
68	Plasma cfDNA	EGFR	c.2235_2249delGGAATTAAGAGAAGC	p. exon19 del	0.06	-
		TET2	c.3965_3966delTG	p.L1322fs	0.02	-
		TP53	c.C10G	p.Q4E	0.1046	-
69	Tumor tissue (FFPE)	EGFR	c.2240_2257delTAAGAGAAGCAACATCTC	p.LREATSP747delinsS	0.003	-
71	Plasma cfDNA	EGFR	c.T2573G	p.L858R	0.18	-
		EGFR	c.C2369T	p.T790M	0.01	-
		PDGFRB	c.C1942T	p.L648F	0.0479	-
		TP53	c.T821C	p.V274A	0.1875	-
73	Plasma cfDNA	EGFR	c.T2573G	p.L858R	0.01	-
74	Plasma cfDNA	AKT1	c.C515T	p.T172I	0.104	-
		BLM	c.G3937A	p.E1313K	0.115	-
		EGFR	c.T185G	p.L62R	0.2209	-
		EGFR	c.T2573G	p.L858R	0.1819	-
		MDM4	c.C376T	p.H126Y	0.0634	-
		SDHA	c.T761G	p.V254G	0.155	-
		TP53	c.G445C	p.D149H	0.141	-
75	Plasma cfDNA	BRAF	c.T1799A	p.V600E	0.0732	-
		CEBPA	c.T568C	p.S190P	0.0402	-
		CYP2D6	c.137_138insT	p.L46fs	0.013	-
		EGFR	c.T2573G	p.L858R	0.3145	-
		FLT4	CNV	-	-	2.21
		NOTCH1	c.G4562C	p.C1521S	0.3528	-
		NTRK1	CNV	-	-	2.44
		PGR	c.G487A	p.E163K	0.2837	-
		RB1	CNV	-	-	0.41
		RICTOR	CNV	-	-	2.7
		SMAD4	c.1565_1566insT	p.P522fs	0.834	-
		TOP1	c.G436A	p.D146N	0.1394	-
		TP53	CNV	-	-	0.64
		TTF1	c.A819C	p.K273N	0.0189	-
76	Tumor tissue (FFPE)	ARID1A	c.C4724A	p.P1575Q	0.2642	-
		AXIN2	c.C148T	p.P50S	0.4355	-
		BLM	c.G2836A	p.V946I	0.1392	-
		BRCA2	c.A1114C	p.N372H	0.2424	-
		BRD4	c.G1688A	p.S563N	0.1314	-
		CYP2B6	c.A785G	p.K262R	0.3021	-
		EGFR	c.T2573G	p.L858R	0.1405	-
		ERCC2	c.A2251C	p.K751Q	0.1011	-
		ESR1	c.G433A	p.G145S	0.1742	-
		FAT1	c.G12670A	p.A4224T	0.2632	-
		FAT1	c.C367T	p.L123F	0.2782	-
		GATA6	c.G43C	p.G15R	0.1905	-
		GRIN2A	c.T2627C	p.I876T	0.1753	-
		INSRR	c.C3311T	p.A1104V	0.1573	-
		KMT2B	c.C5486T	p.P1829L	0.24	-
		MUTYH	c.G654C	p.Q218H	0.1611	-
		NQO1	c.C559T	p.P187S	0.2328	-
		PALLD	c.C121G	p.P41A	0.2301	-
		PDCD1LG2	c.T722C	p.I241T	0.2941	-
		SDHA	c.G1969A	p.V657I	0.2	-
		SDHA	c.A1886T	p.Y629F	0.2136	-
		TP53	c.C98G	p.P33R	0.2203	-
		TPMT	c.C676T	p.R226X	0.2632	-
		TTF1	c.T908C	p.V303A	0.3636	-
		TUBB2A	c.G553A	p.A185T	0.1282	-
		XPA	c.G163T	p.A55S	0.1905	-
		XRCC1	c.G839A	p.R280H	0.3504	-
77	Plasma cfDNA	EGFR	c.T2573G	p.L858R	0.0953	-
		EMSY	c.G2310C	p.E770D	0.0451	-
		PIK3CA	c.C311T	p.P104L	0.0765	-
78	Plasma cfDNA	EGFR	c.T2573G	p.L858R	0.003	-
79	Plasma cfDNA	CTCF	c.C761A	p.P254Q	0.0283	-
		EGFR	c.T2573G	p.L858R	0.01	-
		ERCC4	c.G974T	p.G325V	0.0332	-
80	Plasma cfDNA	CDK12	CNV	-	-	14.7
		CEP57	c.G1390C	p.D464H	0.2636	-
		EGFR	c.T2573G	p.L858R	0.34	-
		ERBB2	CNV	-	-	15.01
		MUTYH	c.579_580delGC	p.E194fs	0.009	-
		PIK3CA	c.A3140G	p.H1047R	0.3465	-
		RB1	CNV	-	-	0.61
		RPTOR	c.C3184A	p.Q1062K	0.1654	-
		TP53	c.G763T	p.E255X	0.3189	-
81	Plasma cfDNA	EGFR	c.T2573G	p.L858R	0.006	-
82	Plasma cfDNA	EGFR	c.T2573G	p.L858R	0.03	-
83	Tumor tissue (fresh)	DNMT3A	c.G364T	p.V122L	0.5569	-
		EGFR	CNV	-	-	2.02
		EGFR	c.T185G	p.L62R	0.4245	-
		EGFR	c.T2573G	p.L858R	0.4344	-
		KRAS	c.G35A	p.G12D	0.4483	-
		PTK2	CNV	-	-	2.42
		RECQL4	CNV	-	-	2.81
		SMO	c.T1820G	p.L607R	0.2976	-
		TP53	CNV	-	-	0.6
		TP53	c.C322T	p.R108W	0.5045	-
84	Plasma cfDNA	EGFR	c.T2573G	p.L858R	0.003	-
86	Plasma cfDNA	EGFR	c.T2573G	p.L858R	0.01	-
		TP53	c.C69A	p.C23X	0.0546	-
87	Pleural effusion (cfDNA)	AKT2	CNV	-	-	2.24
		CCNE1	CNV	-	-	2.12
		EGFR	c.G2429A	p.G810D	0.12	-
		EGFR	c.T2573G	p.L858R	0.14	-
88	Plasma cfDNA	CSF1R	c.T89C	p.L30P	0.24	-
		EGFR	CNV	-	-	2.01
		EGFR	c.T2573G	p.L858R	0.2919	-
		MDM2	c.A742C	p.I248L	0.208	-
		PLK1	CNV	-	-	2.04
		TP53	CNV	-	-	0.65
90	Plasma cfDNA	ARID1A	c.C5138G	p.S1713X	0.2907	-
		AURKB	c.C474A	p.H158Q	0.0138	-
		BRCA1	c.G4606A	p.E1536K	0.0966	-
		CDK8	c.A752C	p.Q251P	0.1474	-
		DDR2	c.G319T	p.A107S	0.335	-
		EGFR	c.2296_2297insTGGCCAGCG	p.M766delinsMASV	0.2	-
		RUNX1	c.G79A	p.E27K	0.1848	-
		TP53	c.G410T	p.C137F	0.4039	-
91	Plasma cfDNA	CCND1	CNV	-	-	5.6
		CCNE1	CNV	-	-	3.14
		CREBBP	c.A3569G	p.D1190G	0.1542	-
		CREBBP	c.G4416A	p.W1472X	0.6606	-
		DDR2	c.G2003A	p.R668H	0.223	-
		KMT2A	c.G908T	p.R303I	0.0122	-
		NOTCH1	CNV	-	-	3.6
		RECQL4	c.C2296G	p.R766G	0.0195	-
		TP53	c.A688C	p.T230P	0.9261	-
92	Plasma cfDNA	CDK12	CNV	-	-	2.11
		ERBB2	c.2326_2327insTAT	p.G776delinsVC	0.54	-
		KLLN	c.C194T	p.S65L	0.2179	-
		MDM2	CNV	-	-	3.81
		PTK2	CNV	-	-	2.52
93	Plasma cfDNA	BRCA2	c.C4403A	p.S1468Y	0.0123	-
		NOTCH2NL	c.T379A	p.F127I	0.0105	-
		TP53	c.C515T	p.T172I	0.0201	-
"-": not applicable
MAF: mutant allele frequency
