# Supplementary material for: Investigating Novel Resistance Mechanisms to Third-Generation EGFR Tyrosine Kinase Inhibitor Osimertinib in Non–Small Cell Lung Cancer Patients
Source: Oxford University Press journal article supplement (doi:10.1158/1078-0432.ccr-17-2310), 2018-03-05
Supplement: 10780432ccr172310-sup-187547_3_supp_4572575_p47r8g.xlsx [file 10780432ccr172310-sup-187547_3_supp_4572575_p47r8g.xlsx]

## Sheet: Clinical information (81)
Supplemental Table 4. Clinical and treatment information for 81 patients with only post-osimertinib samples tested by NGS.
Case ID	Gender	Age at diagnosis	Smoking	Histological type at the time of diagnosis	Stage	EGFR status		History of targeted therapies before osimertinib		PFS of Osimertinib treatment (months)
								Drug used	PFS (months)
						at diagnosis	after 1st line treatment
1	F	74	No	Adenocarcinoma	IV	-	-	icotinib	36	12
2	F	45	No	Adenocarcinoma	IV	-	T790M	icotinib	5	12
3	F	61	-	Adenocarcinoma	IV	Ex19 del	-	icotinib	6	7
4	M	76	No	Adenocarcinoma	IV	-	-	gefitinib	19	17
5	F	61	No	Adenocarcinoma	IV	-	-	gefitinib	18	11
6	F	64	No	Adenocarcinoma	IV	-	-	gefitinib	24	6
7	M	61	No	Adenocarcinoma	IV	Ex19 del	Ex19 del; T790M	icotinib	5	8
8	F	41	No	Adenocarcinoma	IV	Ex19 del	-	erlotinib	24	12
9	M	59	No	Adenocarcinoma	IV	-	-	gefitinib	10	6
10	M	42	No	Adenocarcinoma	IV	-	T790M	gefitinib	12	16
11	F	50	No	Adenocarcinoma	IV	-	-	gefitinib	15	11
								afatinib	4
12	M	57	-	Adenocarcinoma	IV	-	-	erlotinib	31	10
								afatinib	3
13	F	60	No	Adenocarcinoma	-	L858R	-	gefitinib	5	5
14	M	55	No	Adenocarcinoma	IV	L858R	-	erlotinib	8	12
16	M	43	No	Adenocarcinoma	IV	-	-	Bevacizumab	3	20
17	F	52	No	Adenocarcinoma	IV	Ex19 del	Ex19 del; T790M	gefitinib	18	10
18	F	50	No	Small cell	IV	-	-	gefitinib	8	14
								Bevacizumab	5
19	M	-	-	Adenocarcinoma	IV	Ex19 del	Ex19 del; T790M	gefitinib	7	7
20	M	54	No	Adenocarcinoma	-	-	-	gefitinib	13	8
21	F	62	No	Adenocarcinoma	III	-	-	gefitinib	18	10
23	M	50	Yes	Adenocarcinoma	IV	-	-	icotinib	9	14
24	F	73	No	Adenocarcinoma	IV	-	-	gefitinib	21	17
								afatinib	5
25	M	55	-	Adenocarcinoma	IV	-	-	gefitinib	13	9
26	F	58	No	Adenocarcinoma	-	-	-	gefitinib	12	11
								afatinib	12
27	F	53	No	Adenocarcinoma	IV	L858R	L858R ; T790M	gefitinib	5	7
29	F	76	-	Adenocarcinoma	IV	-	-	icotinib	6	6
30	F	62	No	Adenocarcinoma	III	L858R	-	gefitinib	14	5
31	M	60	No	Adenocarcinoma	IV	-	T790M	afatinib	19	-
33	F	69	No	Adenocarcinoma	III	-	-	gefitinib	24	4
								erlotinib	22
34	F	60	No	Adenocarcinoma	IV	-	-	icotinib	17	8
35	M	52	No	Adenocarcinoma	IV	Ex19 del	-	icotinib	18	4
37	M	51	Yes	-	IV	L858R	-	icotinib	11	5
38	F	86	No	Adenocarcinoma	-	-	-	gefitinib	32	5
								afatinib	16
39	F	48	No	Adenocarcinoma	IV	Ex19 del	-	gefitinib	9	17
40	F	54	No	Adenocarcinoma	IV	-	-	gefitinib	22	10
41	F	69	No	Adenocarcinoma	IV	Ex19 del	-	gefitinib	11	14
42	F	34	No	Adenocarcinoma	-	Ex19 del	-	gefitinib	8	8
45	F	52	No	Adenocarcinoma	IIIB	-	-	erlotinib	16	12
46	F	59	No	Adenocarcinoma	IV	-	-	gefitinib	12	-
47	M	52	Yes	Adenocarcinoma	IV	-	-	erlotinib	11	10
48	F	51	-	Adenocarcinoma	IV	-	-	gefitinib	18	12
								erlotinib	34
49	F	64	-	Adenocarcinoma	IV	-	-	gefitinib	12	7
50	F	63	No	Adenocarcinoma	-	-	-	gefitinib	16	10
51	F	56	No	Adenocarcinoma	IV	-	-	icotinib	8	12
52	M	61	No	Adenocarcinoma	IV	-	-	gefitinib	21	19
53	M	74	No	Adenocarcinoma	IV	Ex19 del	-	erlotinib	11	6
54	F	61	No	Adenocarcinoma	IV	Ex19 del	-	gefitinib	9	11
55	M	68	No	Adenocarcinoma	IV	Ex19 del	-	icotinib	8	10
56	M	55	Yes	Adenocarcinoma	IV	Ex19 del	-	gefitinib	12	5
57	M	61	-	Adenocarcinoma	-	-	-	icotinib	14	15
58	F	54	No	Squamous	IV	Ex19 del	Ex19 del; T790M	First generation TKI (details missing)	8	3
60	M	61	-	Adenocarcinoma	IV	-	-	icotinib	6	10
61	F	36	No	Adenocarcinoma	IV	-	-	Bevacizumab	2	4
62	M	38	Yes	Adenocarcinoma	IV	Ex19 del	-	gefitinib	9	13
63	M	66	Yes	Adenocarcinoma	IV	Ex19 del	-	icotinib	7	8
64	M	54	No	Adenocarcinoma	-	-	-	icotinib	12	12
65	F	64	No	Adenocarcinoma	IV	Ex19 del	-	gefitinib	15	3
66	F	61	No	Adenocarcinoma	IV	-	-	gefitinib	12	12
67	M	48	Yes	Adenocarcinoma	IV	Ex19 del	Ex19 del; T790M	icotinib	5	8
68	F	70	No	-	IV	Ex19 del	-	icotinib	10	5
69	M	52	-	Adenocarcinoma	IV	-	-	erlotinib	10	10
71	M	67	Yes	Adenocarcinoma	IV	-	-	icotinib	5	3
								alfatinib	10
73	F	70	No	Adenocarcinoma	IV	L858R	L858R ; T790M	icotinib	15	21
74	M	63	No	Adenocarcinoma	IV	L858R	L858R ; T790M	icotinib	20	7
75	F	70	-	Adenocarcinoma	IV	-	-	gefitinib	12	3
76	M	69	No	Adenocarcinoma	IIA	L858R	L858R ; T790M	erlotinib	34	3
77	M	70	No	Adenocarcinoma	IV	L858R	-	erlotinib	12	8
78	F	80	No	Adenocarcinoma	-	-	-	gefitinib	6	10
79	M	50	No	Adenocarcinoma	IV	L858R	-	gefitinib	5	3
80	F	53	No	Adenocarcinoma	IV	-	-	gefitinib	5	4
81	F	54	No	Adenocarcinoma	IV	-	-	gefitinib	23	14
82	F	74	-	Adenocarcinoma	IV	L858R	-	erlotinib	18	5
83	M	60	Yes	Adenocarcinoma	IV	L858R	L858R ; T790M	gefitinib	25	7
84	M	37	No	Adenocarcinoma	IV	-	-	gefitinib	16	10
86	M	42	No	Adenocarcinoma	IV	L858R	-	erlotinib	19	6
87	F	64	No	Adenocarcinoma	IV	L858R	-	erlotinib	17	12
88	F	71	-	Adenocarcinoma	IV	-		icotinib	3	7
90	F	44	No	Adenocarcinoma	IV	-		gefitinib	7	2.5
91	M	68	-	Small cell	IV	-	-	No	-	25
92	M	76	No	Adenocarcinoma	IV	-	-	gefitinib	18	7
93	M	72	No	Squamous	IV	-	-	gefitinib	10	17
"-": not available
